# Supplementary material for: Evolution of enhanced innate immune suppression by SARS-CoV-2 Omicron subvariants
Source: PubMed Central journal article supplement (PMC10847042; doi:10.1038/s41564-023-01588-4), 2024-01-16
Supplement: 41564_2023_1588_MOESM1_ESM.pdf [file 41564_2023_1588_MOESM1_ESM.pdf]

## Reporting Summary

Nature Portfolio wishes to improve the reproducibility of the work that we publish. This form provides structure for consistency and transparency in reporting. For further information on Nature Portfolio policies, see our [Editorial Policies](#) and the [Editorial Policy Checklist](#).

### Statistics

For all statistical analyses, confirm that the following items are present in the figure legend, table legend, main text, or Methods section.

- | n/a                                 | Confirmed                                                                                                                                                                                                                                                                                      |
|-------------------------------------|------------------------------------------------------------------------------------------------------------------------------------------------------------------------------------------------------------------------------------------------------------------------------------------------|
| <input type="checkbox"/>            | <input checked="" type="checkbox"/> The exact sample size ( $n$ ) for each experimental group/condition, given as a discrete number and unit of measurement                                                                                                                                    |
| <input type="checkbox"/>            | <input checked="" type="checkbox"/> A statement on whether measurements were taken from distinct samples or whether the same sample was measured repeatedly                                                                                                                                    |
| <input type="checkbox"/>            | <input checked="" type="checkbox"/> The statistical test(s) used AND whether they are one- or two-sided<br><i>Only common tests should be described solely by name; describe more complex techniques in the Methods section.</i>                                                               |
| <input type="checkbox"/>            | <input checked="" type="checkbox"/> A description of all covariates tested                                                                                                                                                                                                                     |
| <input type="checkbox"/>            | <input checked="" type="checkbox"/> A description of any assumptions or corrections, such as tests of normality and adjustment for multiple comparisons                                                                                                                                        |
| <input type="checkbox"/>            | <input checked="" type="checkbox"/> A full description of the statistical parameters including central tendency (e.g. means) or other basic estimates (e.g. regression coefficient) AND variation (e.g. standard deviation) or associated estimates of uncertainty (e.g. confidence intervals) |
| <input type="checkbox"/>            | <input checked="" type="checkbox"/> For null hypothesis testing, the test statistic (e.g. $F$ , $t$ , $r$ ) with confidence intervals, effect sizes, degrees of freedom and $P$ value noted<br><i>Give <math>P</math> values as exact values whenever suitable.</i>                            |
| <input checked="" type="checkbox"/> | <input type="checkbox"/> For Bayesian analysis, information on the choice of priors and Markov chain Monte Carlo settings                                                                                                                                                                      |
| <input checked="" type="checkbox"/> | <input type="checkbox"/> For hierarchical and complex designs, identification of the appropriate level for tests and full reporting of outcomes                                                                                                                                                |
| <input checked="" type="checkbox"/> | <input type="checkbox"/> Estimates of effect sizes (e.g. Cohen's $d$ , Pearson's $r$ ), indicating how they were calculated                                                                                                                                                                    |

*Our web collection on [statistics for biologists](#) contains articles on many of the points above.*

### Software and code

Policy information about [availability of computer code](#)

Data collection: BD FACSDiva Software Verison 9.0 (BD), Odyssey Infrared Imager software Image Studia Lite V5.2, 7500 Software (Applied Biosystems), WiScan® Hermes 7-Colour High-Content Imaging System (IDEA Bio-Medical).

Data analysis: FlowJo v10.6.2 (Tree Star); Design & Analysis Software Version: 2.6.2 (Thermo Fisher Scientific); Image Studia Lite V5.2 (LI-COR); GraphPad Prism9 Versino 9.0.0; FIJI ImageJ software package40; Athena Image analysis software (IDEA Bio-Medical)

For manuscripts utilizing custom algorithms or software that are central to the research but not yet described in published literature, software must be made available to editors and reviewers. We strongly encourage code deposition in a community repository (e.g. GitHub). See the Nature Portfolio [guidelines for submitting code & software](#) for further information.

### Data

Policy information about [availability of data](#)

All manuscripts must include a [data availability statement](#). This statement should provide the following information, where applicable:

- Accession codes, unique identifiers, or web links for publicly available datasets
- A description of any restrictions on data availability
- For clinical datasets or third party data, please ensure that the statement adheres to our [policy](#)

All data generated or analysed during this study are included in this manuscript (and its supplementary information files). SARS-CoV-2 sequence counts were extracted from CoV-Spectrum (cov-spectrum.org) using genomic data from GSAID. No new algorithms were developed for this project.

## Human research participants

Policy information about [studies involving human research participants and Sex and Gender in Research](#).

|                             |                                              |
|-----------------------------|----------------------------------------------|
| Reporting on sex and gender | <input type="text" value="Not applicable."/> |
| Population characteristics  | <input type="text" value="Not applicable."/> |
| Recruitment                 | <input type="text" value="Not applicable."/> |
| Ethics oversight            | <input type="text" value="Not applicable."/> |

Note that full information on the approval of the study protocol must also be provided in the manuscript.

## Field-specific reporting

Please select the one below that is the best fit for your research. If you are not sure, read the appropriate sections before making your selection.

Life sciences       Behavioural & social sciences       Ecological, evolutionary & environmental sciences

For a reference copy of the document with all sections, see [nature.com/documents/nr-reporting-summary-flat.pdf](https://www.nature.com/documents/nr-reporting-summary-flat.pdf)

## Life sciences study design

All studies must disclose on these points even when the disclosure is negative.

|                 |                                                                                                                                                                                                                                                                                                                                 |
|-----------------|---------------------------------------------------------------------------------------------------------------------------------------------------------------------------------------------------------------------------------------------------------------------------------------------------------------------------------|
| Sample size     | <input type="text" value="No statistical methods were used to pre-determine sample sizes but our sample sizes are similar to those reported in previous publications (Thorne et al, 2022, Nature; Thorne et al, 2021, EMBO J). Multiple independent experiments were repeated to allow for appropriate statistical analysis."/> |
| Data exclusions | <input type="text" value="No data were excluded."/>                                                                                                                                                                                                                                                                             |
| Replication     | <input type="text" value="In vitro experiments were performed independently a minimum of 3 times (unless otherwise stated) to allow for appropriate confidence. All attempts at replication were successful."/>                                                                                                                 |
| Randomization   | <input type="text" value="No randomisation was performed. Experimental groups were treated identical except for the specific variable being tested, thus randomisation is not required."/>                                                                                                                                      |
| Blinding        | <input type="text" value="Blinding was not necessary all measurements were quantified by automated machines, and no data were excluded."/>                                                                                                                                                                                      |

## Reporting for specific materials, systems and methods

We require information from authors about some types of materials, experimental systems and methods used in many studies. Here, indicate whether each material, system or method listed is relevant to your study. If you are not sure if a list item applies to your research, read the appropriate section before selecting a response.

| Materials & experimental systems    |                                                           | Methods                             |                                                    |
|-------------------------------------|-----------------------------------------------------------|-------------------------------------|----------------------------------------------------|
| n/a                                 | Involvement in the study                                  | n/a                                 | Involvement in the study                           |
| <input type="checkbox"/>            | <input checked="" type="checkbox"/> Antibodies            | <input checked="" type="checkbox"/> | <input type="checkbox"/> ChIP-seq                  |
| <input type="checkbox"/>            | <input checked="" type="checkbox"/> Eukaryotic cell lines | <input type="checkbox"/>            | <input checked="" type="checkbox"/> Flow cytometry |
| <input checked="" type="checkbox"/> | <input type="checkbox"/> Palaeontology and archaeology    | <input checked="" type="checkbox"/> | <input type="checkbox"/> MRI-based neuroimaging    |
| <input checked="" type="checkbox"/> | <input type="checkbox"/> Animals and other organisms      |                                     |                                                    |
| <input checked="" type="checkbox"/> | <input type="checkbox"/> Clinical data                    |                                     |                                                    |
| <input checked="" type="checkbox"/> | <input type="checkbox"/> Dual use research of concern     |                                     |                                                    |

## Antibodies

|                 |                                                                                                                                                                                                                                                                                                                                                                                                                                                                |
|-----------------|----------------------------------------------------------------------------------------------------------------------------------------------------------------------------------------------------------------------------------------------------------------------------------------------------------------------------------------------------------------------------------------------------------------------------------------------------------------|
| Antibodies used | <input type="text" value="For flowcytometry and western blot: CR3009 SARS-CoV-2 cross-reactive antibody (a gift from Laura McCoy); secondary Alexa Fluor 488-Donkey-anti-Human IgG (Jackson Labs); rabbit-anti-SARS spike (Invitrogen, PA1-411-1165), mouse-anti-SARS-CoV-2 spike (GeneTex 1A9), rabbit-anti-Orf6 (Abnova, PAB31757), rabbit-anti-Orf9b (ProSci, 9191), rabbit-anti-phospho-STAT1 (Ser727) (CellSignaling, Cat # 9177), rabbit-anti-phospho"/> |
|-----------------|----------------------------------------------------------------------------------------------------------------------------------------------------------------------------------------------------------------------------------------------------------------------------------------------------------------------------------------------------------------------------------------------------------------------------------------------------------------|

STAT1 (Tyr 701) (CellSignaling, Cat# 9167, clone 58D6), rabbit-anti-STAT1 (CellSignaling, Cat# 9172), anit-rabbit-IRF3 (CellSignaling, Cat# 4302), rabbit-anti-phospho IRF3 (CellSignaling, Cat# 29047, clone D6O1M) and rabbit-anti-beta-actin (A2066, SIGMA), IRDye 800CW or 680RD secondary antibodies (Abcam, goat anti-rabbit, goat anti-mouse or goat anti-human).

For immunofluorescence microscopy:

Rabbit-anti-IRF3 antibody (sc-33641, Santa Cruz), rabbit-anti-STAT-1 (D1K9Y, Abcam), mouse-anti-dsRNA (MABE1134, Millipore) and Cr3009 SARS-CoV cross-reactive human-anti-N antibodies; anti-rabbit-AlexaFluor-488, anti-mouse-AlexaFluor-568 and anti-human-Alexa647 conjugates (Jackson ImmunoResearch).

## Validation

Validation for commercial antibodies and target specificity was confirmed in the technical data sheets provided by the manufacturer, containing example data and relevant citations. Furthermore, negative controls (uninfected cells) were included in experiments to confirm absence of or low non-specific binding of antibodies.

CR3009 SARS-CoV-2 cross-reactive: described and validated here <https://www.nibsc.org/documents/ifu/101009.pdf>  
 rabbit-anti-SARS spike (Invitrogen, PA1-411-1165), validated by the manufacturer: <https://www.thermofisher.com/antibody/product/SARS-Coronavirus-Spike-Protein-Antibody-Polyclonal/PA1-41165>

mouse-anti-SARS-CoV-2 spike (GeneTex 1A9), validated by the manufacturer. This antibody detects both SARS-CoV spike and SARS-CoV-2 spike proteins (S2 subunit). Based on sequence analysis, this antibody is predicted to recognize S2' subunit. Our internal testing indicates no cross-reactivity with MERS-CoV spike protein. This antibody is able to detect multiple SARS-CoV-2 VOCs, including Omicron variant. <https://www.genetex.com/Product/Detail/SARS-CoV-SARS-CoV-2-COVID-19-spike-antibody-1A9/GTX632604>  
 rabbit-anti-Orf6 (Abnova, PAB31757), details in the technical datasheet: [https://www.abnova.com/upload/media/product/document/2020/DS\\_PAB31757.pdf](https://www.abnova.com/upload/media/product/document/2020/DS_PAB31757.pdf)

rabbit-anti-Orf9b (ProSci, 9191), details provided by the manufacturer: <https://www.prosci-inc.com/product/sars-cov-2-covid-19-orf9b-antibody-9191/>

rabbit-anti-phospho-STAT1 (Ser727) (CellSignaling, Cat # 9177), Phospho-Stat1 (Ser727) Antibody detects endogenous levels of Stat1 $\alpha$  only when phosphorylated at Ser727. This site is deleted in Stat1 $\beta$ . This antibody does not significantly cross-react with the corresponding phosphorylated residues of other Stat proteins. <https://www.cellsignal.com/products/primary-antibodies/phospho-stat1-ser727-antibody/9177>

rabbit-anti-phospho STAT1 (Tyr 701) (CellSignaling, Cat# 9167, clone 58D6), Phospho-Stat1 (Tyr701) (58D6) Rabbit mAb detects endogenous levels of Stat1 only when phosphorylated at tyrosine 701. The antibody detects phosphorylated tyrosine 701 of p91 Stat1 and also the p84 splice variant. It does not cross-react with the corresponding phospho-tyrosines of other Stat proteins. <https://www.cellsignal.com/products/primary-antibodies/phospho-stat1-tyr701-58d6-rabbit-mab/9167>

rabbit-anti-STAT1 (CellSignaling, Cat# 9172), Stat1 Antibody detects endogenous levels of total Stat1 protein. The antibody detects both Stat1 $\alpha$  (91kDa) and Stat1 $\beta$  (84 kDa) isoforms. <https://www.cellsignal.com/products/primary-antibodies/stat1-antibody/9172>

anit-rabbit-IRF3 (CellSignaling, Cat# 4302), IRF-3 (D83B9) Rabbit mAb detects endogenous levels of total IRF-3 protein. <https://www.cellsignal.com/products/primary-antibodies/irf-3-d83b9-rabbit-mab/4302>

rabbit-anti-phospho IRF3 (CellSignaling, Cat# 29047, clone D6O1M); Phospho-IRF-3 (Ser396) (D6O1M) Rabbit mAb recognizes endogenous levels of IRF-3 protein only when phosphorylated at Ser396. <https://www.cellsignal.com/products/primary-antibodies/phospho-irf-3-ser396-d6o1m-rabbit-mab/29047>

rabbit-anti-beta-actin (A2066, SIGMA), validation and details provided by the manufacturer: <https://www.sigmaaldrich.com/GB/en/product/sigma/a2066>

Rabbit-anti-IRF3 antibody (sc-33641, Santa Cruz), IRF-3 (SL-12) is recommended for detection of IRF-3 of mouse, rat and human origin. <https://datasheets.scbt.com/sc-33641.pdf>

rabbit-anti-STAT-1 (CellSignaling, Cat# 14994, clone D1K9Y), Stat1 (D1K9Y) Rabbit mAb recognizes endogenous levels of total Stat1 protein. This antibody also cross-reacts with an unidentified protein of 150 kDa. <https://www.cellsignal.com/products/primary-antibodies/stat1-d1k9y-rabbit-mab/14994>

mouse-anti-dsRNA (MABE1134, Millipore), Clone rJ2 specifically recognizes double stranded RNA (dsRNA) of greater than 40 bp in length that is generated during the replication of positive sense genome viruses. [https://www.merckmillipore.com/GB/en/product/Anti-dsRNA-Antibody-clone-rJ2,MM\\_NF-MABE1134-25UL](https://www.merckmillipore.com/GB/en/product/Anti-dsRNA-Antibody-clone-rJ2,MM_NF-MABE1134-25UL)

## Eukaryotic cell lines

Policy information about [cell lines and Sex and Gender in Research](#)

### Cell line source(s)

Calu-3 cells were purchased from AddexBio (C0016001), Caco-2 cells were a kind gift from Dalan Bailey (Pirbright Institute) and HeLa-ACE2 cells were a gift from James E Voss described in Rogers et al, 2020, Science. A459 cells expressing ACE2 and TMPRSS2 were a gift from Massimo Palmarini (CVR, Glasgow) described in Willet et al., 2022, Nature Microbiology.

### Authentication

Cell lines were commercially procured and confirmed to be the cell lines indicated and mycoplasma-free by the supplier. Cell lines that were received from collaborators were confirmed to be the cell lines indicated by the respective labs.

### Mycoplasma contamination

Random mycoplasma testing was conducted and cells tested negative.

### Commonly misidentified lines (See [ICLAC](#) register)

None

## Flow Cytometry

### Plots

Confirm that:

- The axis labels state the marker and fluorochrome used (e.g. CD4-FITC).
- The axis scales are clearly visible. Include numbers along axes only for bottom left plot of group (a 'group' is an analysis of identical markers).
- All plots are contour plots with outliers or pseudocolor plots.
- A numerical value for number of cells or percentage (with statistics) is provided.

### Methodology

Sample preparation

Adherent cells were trypsinised and fixed in 4% formaldehyde prior to intracellular staining for SARS-CoV-2 nucleocapsid (N) protein. For N detection, cells were permeabilised for 15 min with Intracellular Staining Perm Wash Buffer (BioLegend) and subsequently incubated with 1µg/ml CR3009 SARS-CoV-2 cross-reactive antibody (a gift from Laura McCoy) for 30 min at room temperature. Primary antibodies were detected by incubation with secondary Alexa Fluor 488-Donkey-anti-Human IgG (Jackson Labs).

Instrument

All samples were acquired on a BD Fortessa X20 or LSR II using BD FACSDiva software.

Software

Data was analysed using FlowJo v10 (Tree Star).

Cell population abundance

N/A. Flowcytometry was used to determine SARS-CoV-2 infection levels in Calu-3 monocultures.

Gating strategy

Infected cells were identified as follows: Calu-3 cells identified by SSC-A vs FSC-A -> Singlets (FSC-A vs FSC-H) -> Nucleocapsid positive cells (N+) (gated on uninfected cells)

- Tick this box to confirm that a figure exemplifying the gating strategy is provided in the Supplementary Information.
