# Supplementary material for: Evolution of enhanced innate immune suppression by SARS-CoV-2 Omicron subvariants
Source: Springer Nature journal article supplement (doi:10.1038/s41564-023-01588-4), 2024-01-16

**Figure 3a**

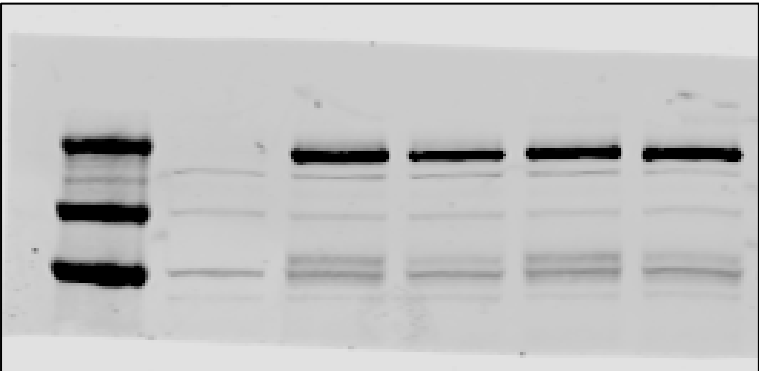

← Spike

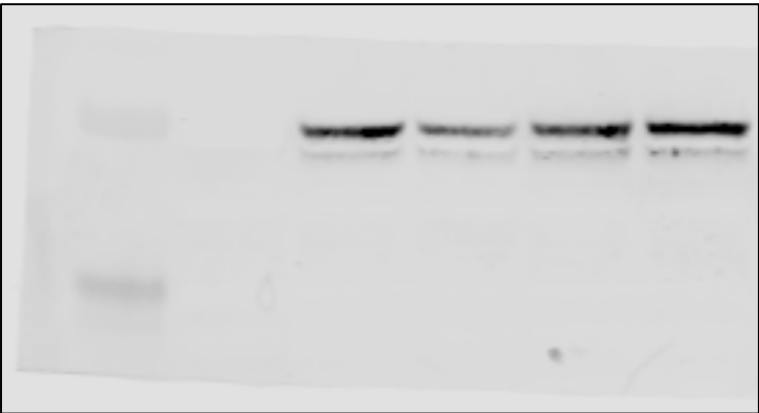

← Nucleocapsid

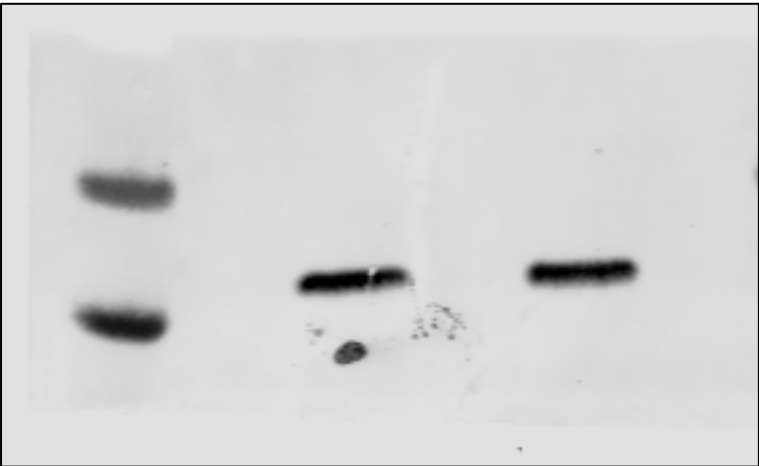

← Orf6

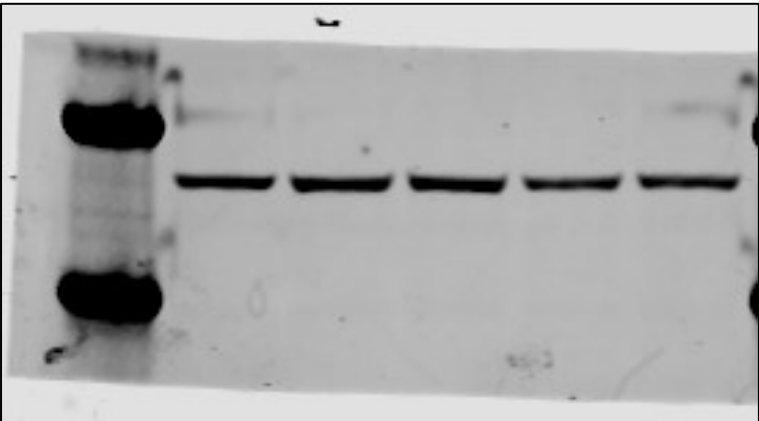

←  $\beta$ -Actin

**Figure 3b**

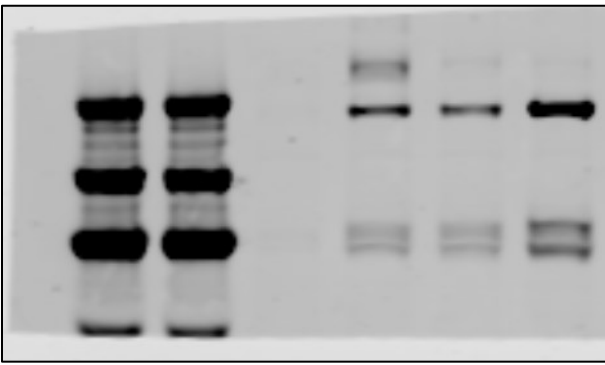

← Spike

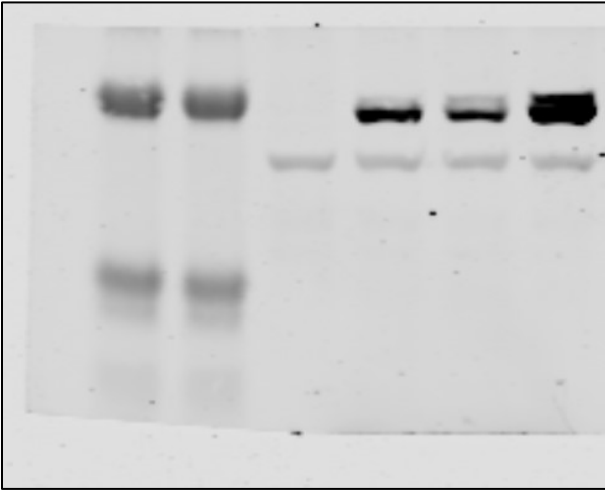

← Nucleocapsid

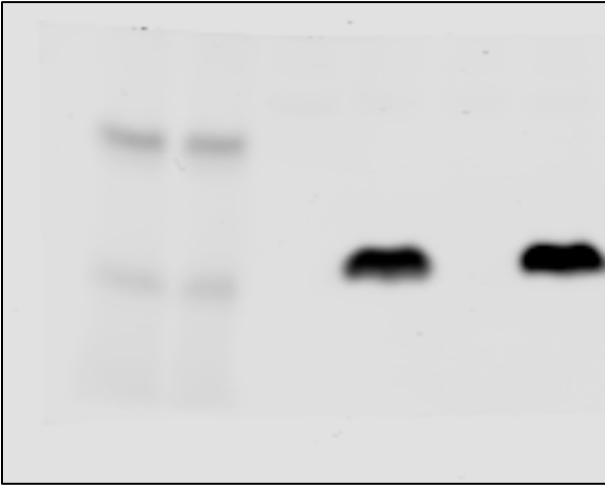

← Orf6

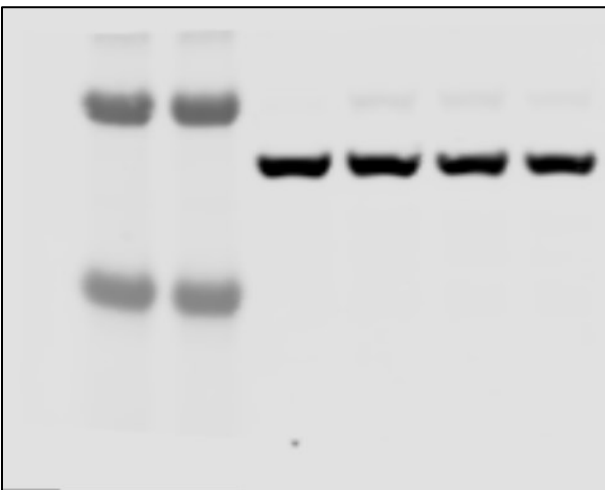

←  $\beta$ -Actin

**Figure 3m**

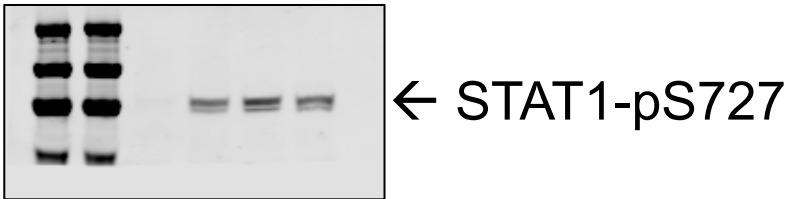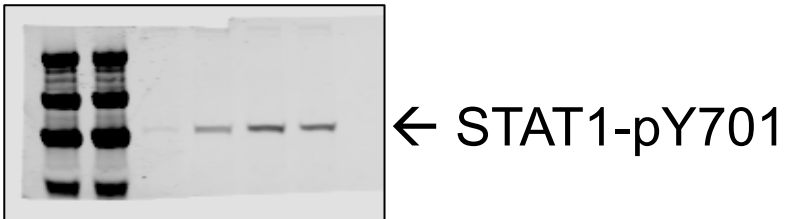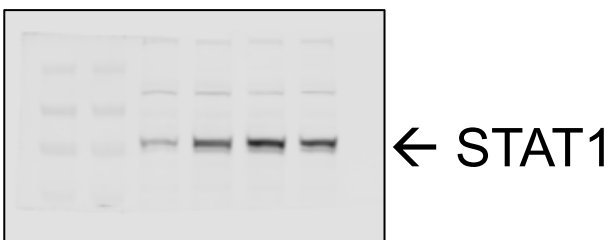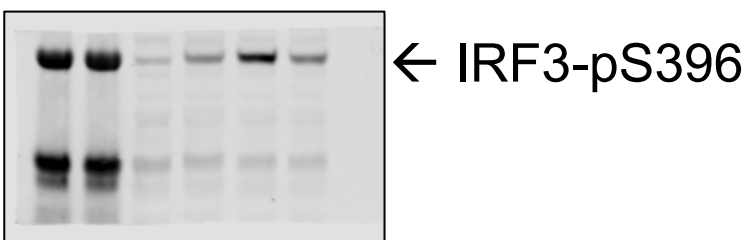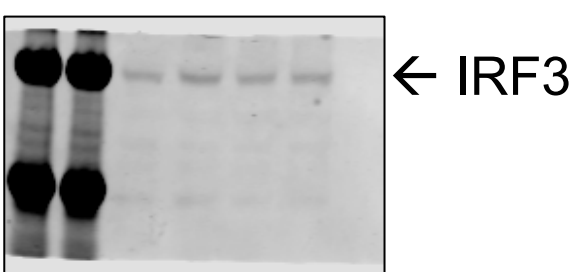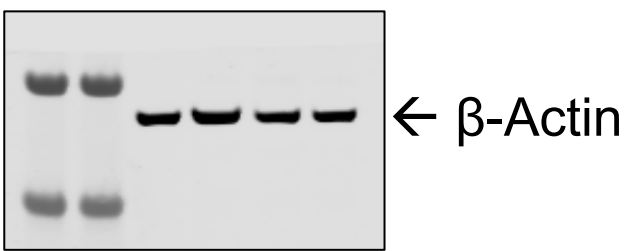

Supplement: 41564_2023_1588_MOESM6_ESM.pdf [file 41564_2023_1588_MOESM6_ESM.pdf]
