# Supplementary material for: Evolution of enhanced innate immune suppression by SARS-CoV-2 Omicron subvariants
Source: PubMed Central journal article supplement (PMC10847042; doi:10.1038/s41564-023-01588-4), 2024-01-16
Supplement: 41564_2023_1588_MOESM8_ESM.pdf [file 41564_2023_1588_MOESM8_ESM.pdf]

Figure 4h

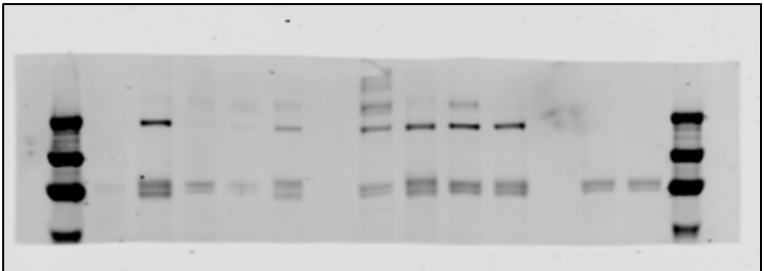

← Spike

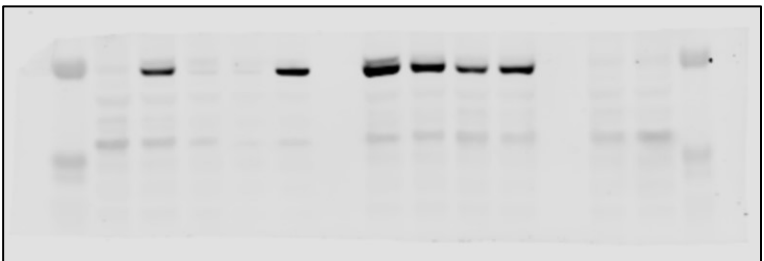

← Nucleocapsid

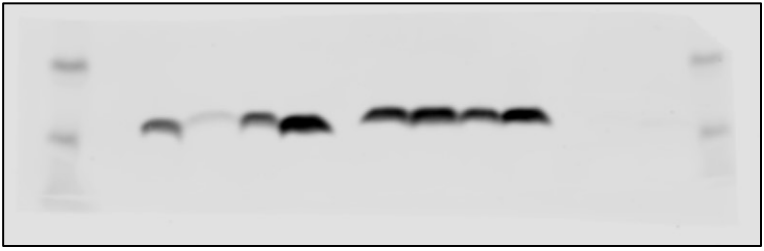

← Orf6

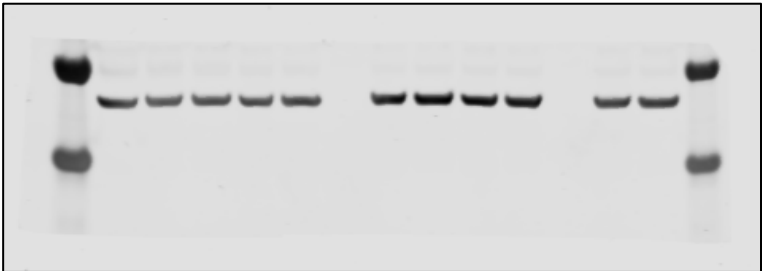

←  $\beta$ -Actin

**Figure 4i**

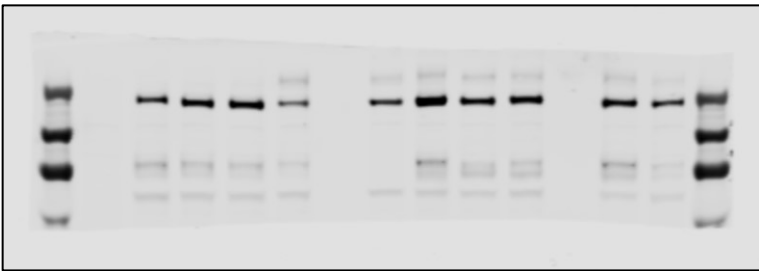

← Spike

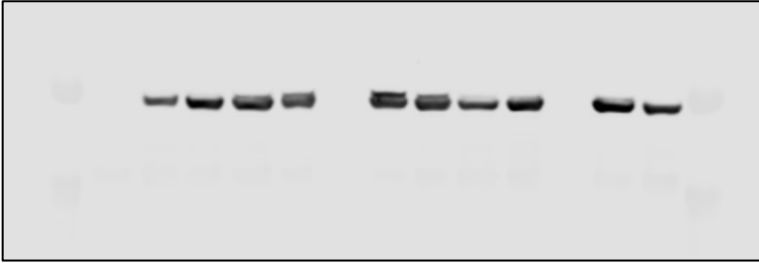

← Nucleocapsid

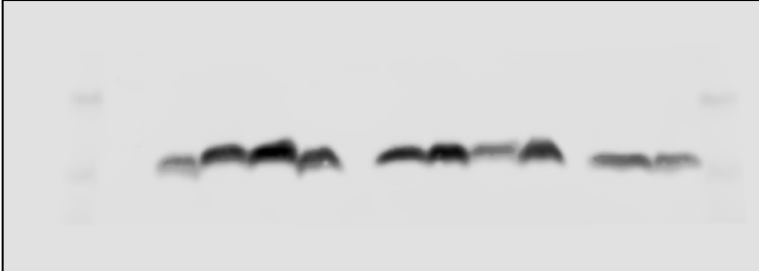

← Orf6

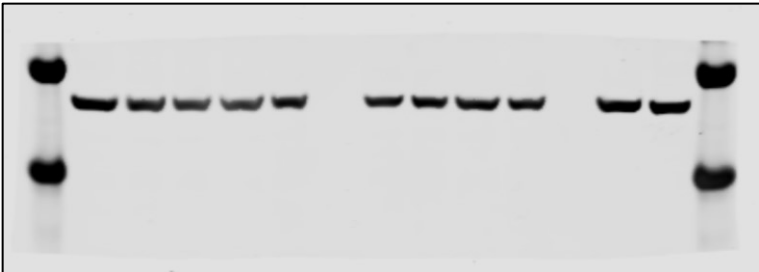

←  $\beta$ -Actin

**Figure 4j**

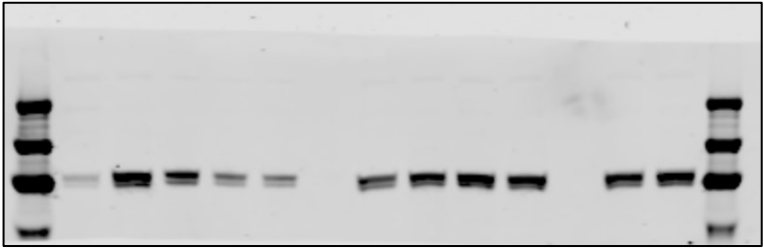

← STAT1-pY701

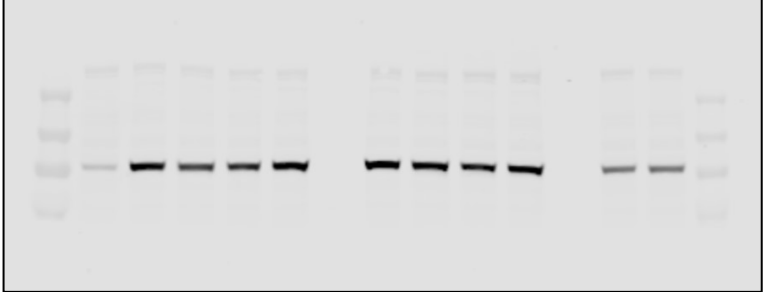

← STAT1-pS727

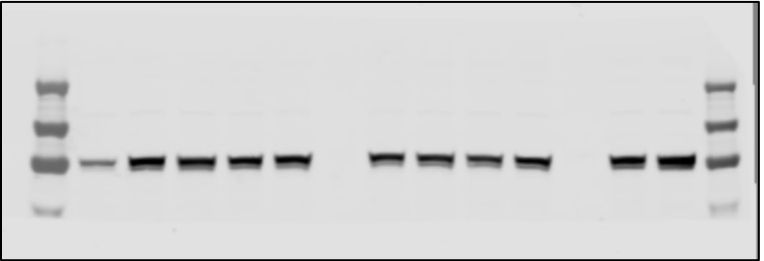

← STAT1

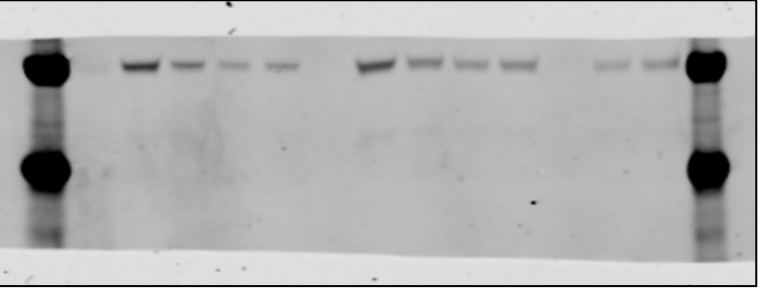

← IRF3-pS396

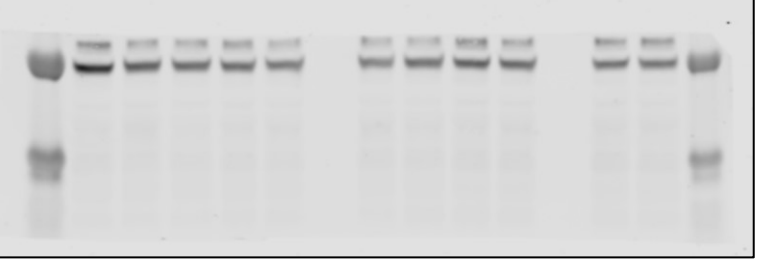

← IRF3

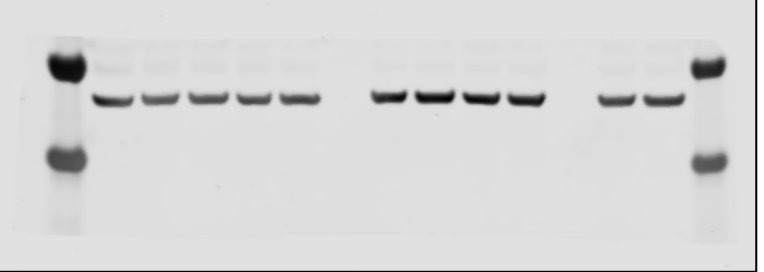

←  $\beta$ -Actin
