# Supplementary material for: Evolution of enhanced innate immune suppression by SARS-CoV-2 Omicron subvariants
Source: Springer Nature journal article supplement (doi:10.1038/s41564-023-01588-4), 2024-01-16
Supplement: 41564_2023_1588_MOESM10_ESM.pdf [file 41564_2023_1588_MOESM10_ESM.pdf]

**Extended Data Figure 1f**

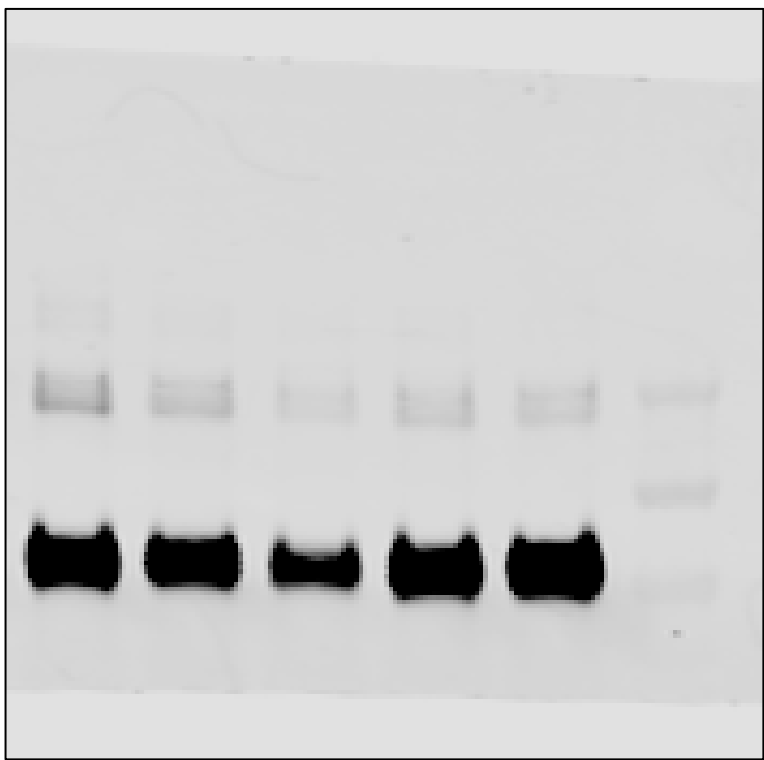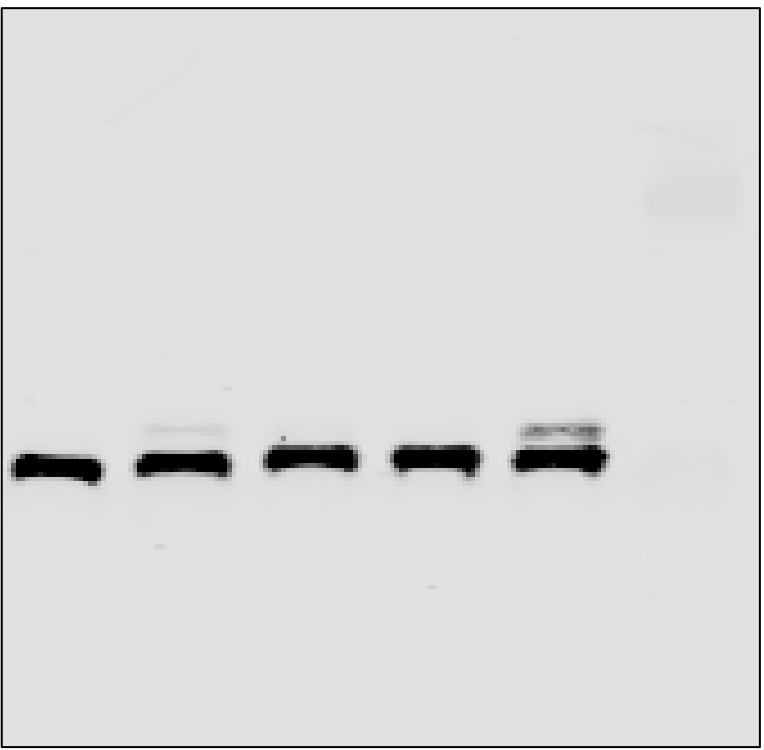

← Spike

← S2

← Nucleocapsid
