# Supplementary material for: Evolution of enhanced innate immune suppression by SARS-CoV-2 Omicron subvariants
Source: Springer Nature journal article supplement (doi:10.1038/s41564-023-01588-4), 2024-01-16
Supplement: 41564_2023_1588_MOESM14_ESM.pdf [file 41564_2023_1588_MOESM14_ESM.pdf]

**Extended Data Figure 4a**

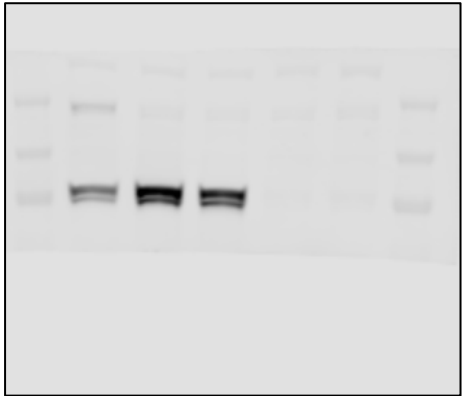

← STAT1-pY701

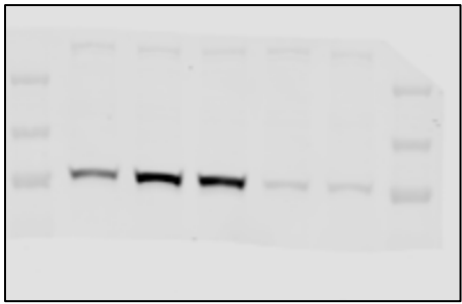

← STAT1-pS727

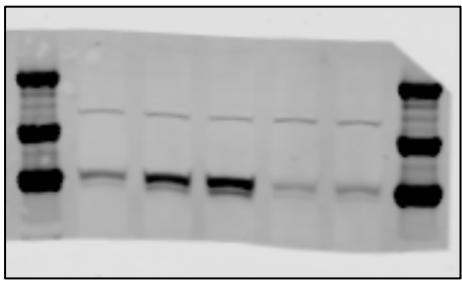

← STAT1

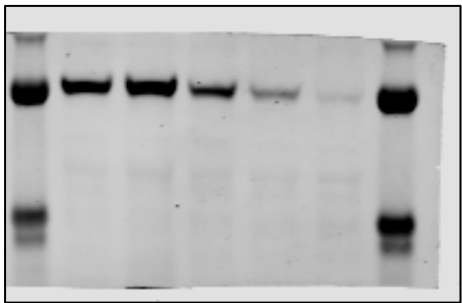

← IRF3-pS396

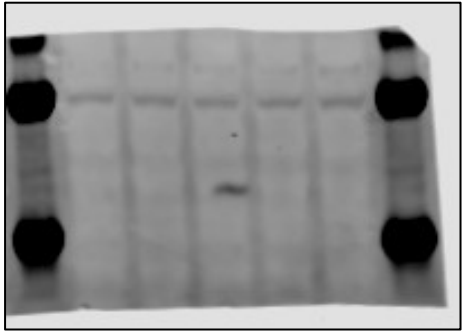

← IRF3

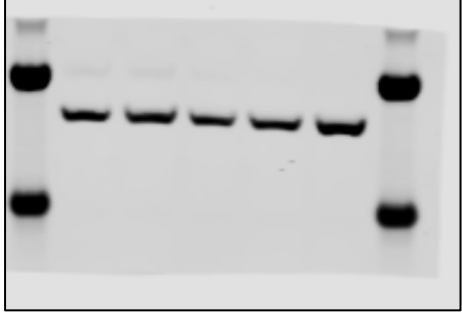

←  $\beta$ -Actin

**Extended Data Figure 4d**

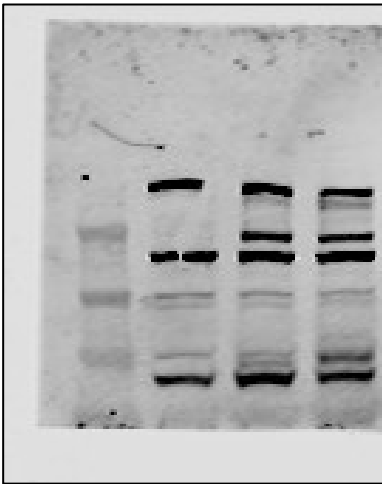

← Spike

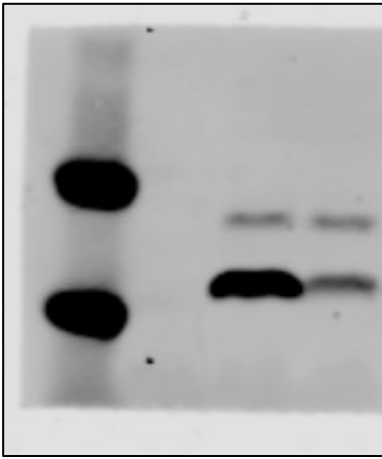

← Orf9b

← Orf6

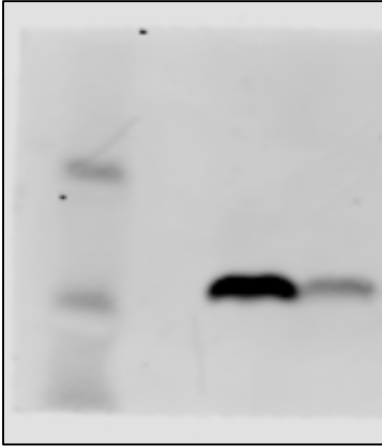

← Orf6

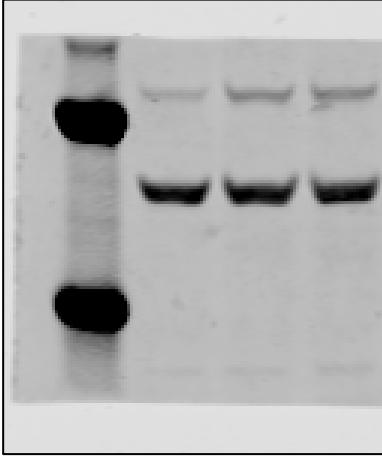

← β-Actin

# Extended Data Figure 4e

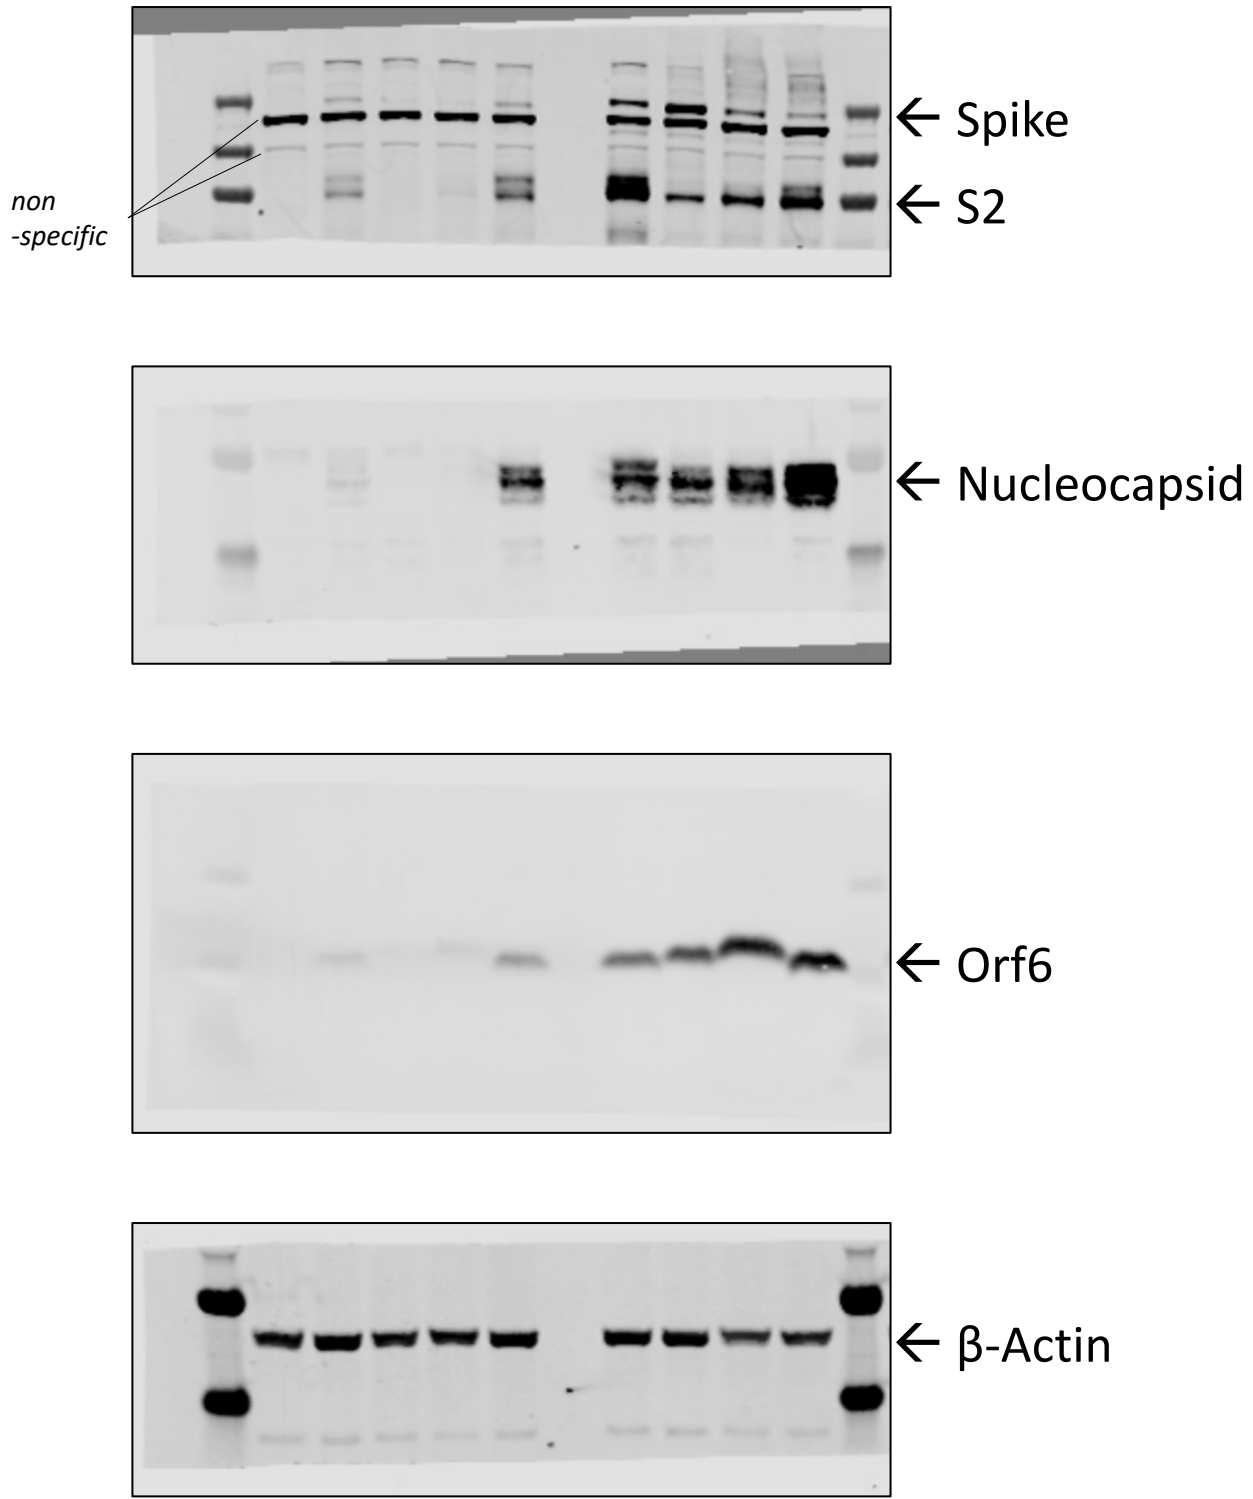

# Extended Data Figure 4l

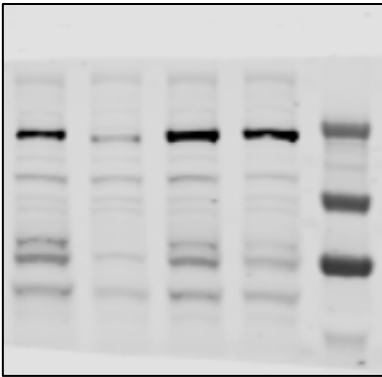

← Spike

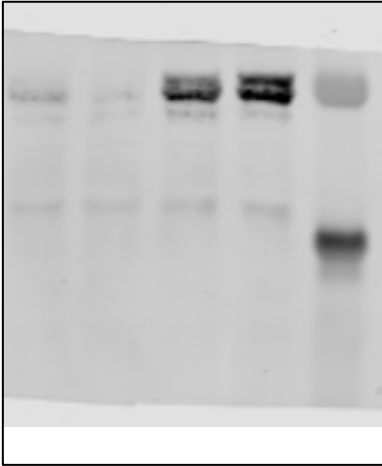

← Nucleocapsid

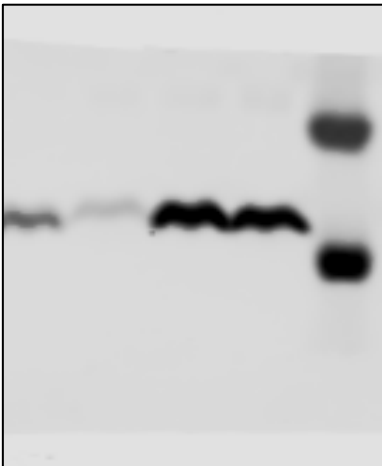

← Orf6

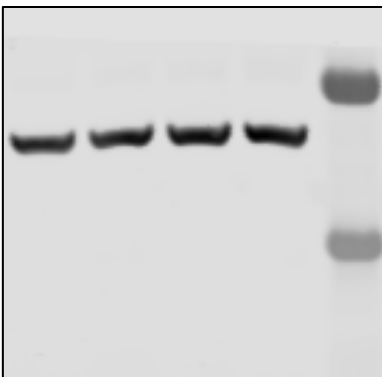

←  $\beta$ -Actin

# Extended Data Figure 4o

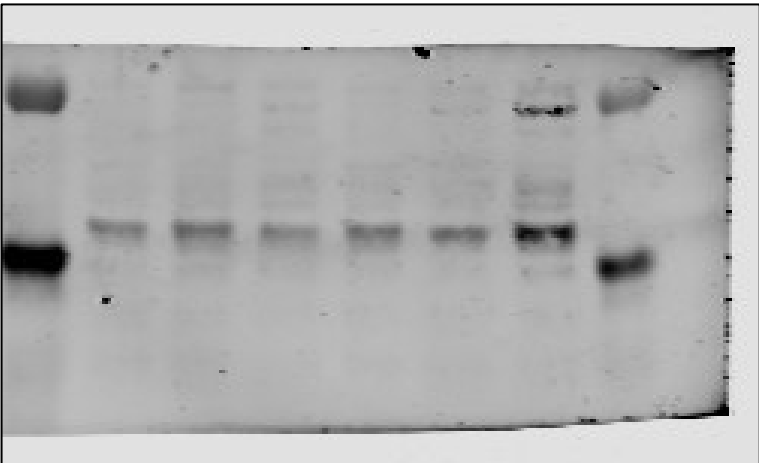

← Nucleocapsid

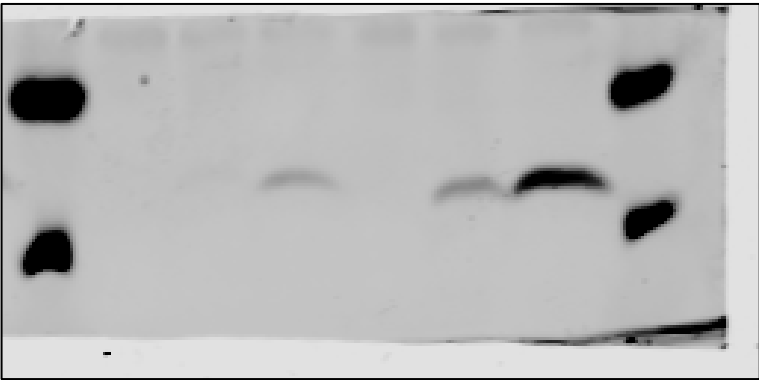

← Orf6

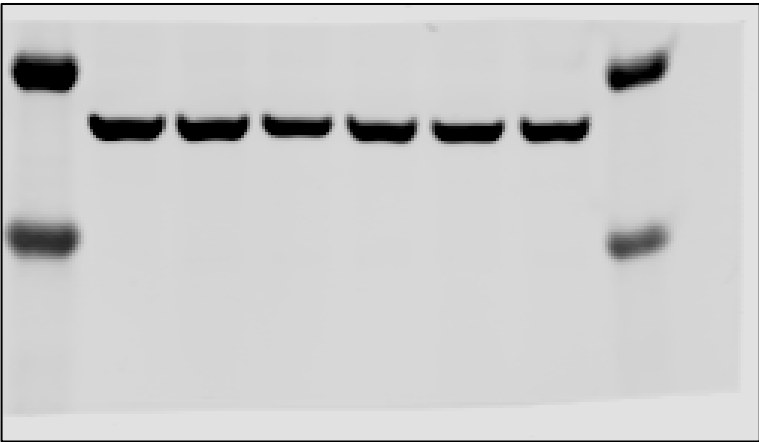

← β-Actin
